# Supplementary material for: Palladium-catalyzed decarboxylative coupling of aromatic acids with aryl halides or unactivated arenes using microwave heating
Source: Royal Society of Chemistry journal article supplement (doi:10.1039/b813998a), 2008-01-01
Supplement: b813998a.pdf [file b813998a.pdf]

Supplementary Material (ESI) for Chemical Communications  
This journal is (c) The Royal Society of Chemistry 2008

## **Palladium-Catalyzed Decarboxylative Coupling of Aromatic Acids with Aryl Halides or Unactivated Arenes Using Microwave Heating**

Adelina Voutchkova,<sup>a</sup> Abigail Coplin, Nicholas Leadbeater<sup>b</sup> and Robert H. Crabtree \*

<sup>a</sup> *Chemistry Department, Yale University, 225 Prospect St, New Haven, CT, 06511; Tel: +1-203-432-3925; E-mail: robert.crabtree@yale.edu*

<sup>b</sup> *Department of Chemistry, University of Connecticut, 55 North Eagleville Road, Storrs, CT 06269-3060 USA. Fax: +1 860 486 2981; Tel: +1 860 486 5076; E-mail: nicholas.leadbeater@uconn.edu*

### **CONTENTS:**

1. Screening of catalytic conditions for catalytic coupling of benzoic acids with aryl iodides
2. General catalytic protocol for coupling of benzoic acids with aryl iodides
3. General catalytic protocol for coupling of benzoic acids with arenes
4. Characterization of organic products

## General

Dimethylsulfoxide and dimethylformamide were dried and degassed over activated 4 Å molecular sieves. Anhydrous deuterated dimethylsulfoxide (d<sub>6</sub>-DMSO) was obtained from Cambridge Isotopes in 1-mL ampules and used immediately after opening. All reactions and manipulations involving organometallic compounds were carried out under dry nitrogen and in oven-dried glassware. Reagents were obtained from commercial sources and were used without further purification: <sup>t</sup>BuXPhos<sup>12</sup> was obtained from Sigma-Aldrich; Pd(OAc)<sub>2</sub> was obtained from Strem Chemicals. N,N'-dimethylimidazolium carboxylate was prepared as previously reported.<sup>13</sup> <sup>1</sup>H- and <sup>13</sup>C-NMR spectra were recorded on Bruker 300, 400 or 500 MHz spectrometers. Coupling constants *J* are quoted in Hz. A Biotage Initiator microwave unit was used for all microwave heating. Microwave reactor tubes were obtained from Biotage. Compounds **1**<sup>1</sup>, **2**<sup>2</sup>, **3**<sup>3</sup>, **4**<sup>4</sup>, **6**<sup>5</sup>, **7**<sup>6</sup>, **8**<sup>7</sup>, **9**<sup>8</sup>, **10**<sup>9</sup>, **11**<sup>10</sup>, **12**<sup>11</sup> were previously described.

### Screening of catalytic conditions for catalytic coupling of benzoic acids with aryl iodides

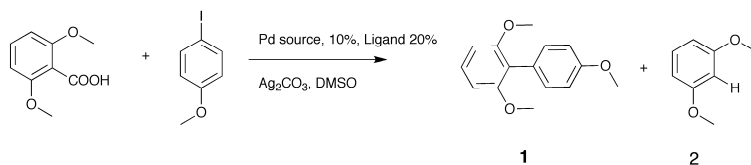

**Table 1.** Screening of reaction conditions for the reaction shown:

| <i>Entry</i> | <i>Ligand</i>                                     | <i>% yield 1</i> | <i>% yield 2</i> | <i>Ratio 1/2</i> |
|--------------|---------------------------------------------------|------------------|------------------|------------------|
| 1            | Silver oxide                                      | 62               | 29               | 2.13             |
| 2            | Silver carbonate                                  | 60               | 23               | 2.52             |
| 3            | Silver oxide 0.5 equiv                            | 56               | 44               | 1.28             |
| 4            | Copper(I) iodide + K <sub>2</sub> CO <sub>3</sub> | 29               | 59               | 0.49             |

|    |                                          |    |    |      |
|----|------------------------------------------|----|----|------|
| 5  | Copper(II) carbonate + KF                | 25 | 42 | 0.62 |
| 6  | Silver benzoate                          | 16 | 37 | 0.42 |
| 7  | Copper(I) oxide                          | 15 | 75 | 0.2  |
| 8  | Silver trifluoroacetate                  | 0  | 0  | n/a  |
| 9  | Silver formate                           | 0  | 31 | 0    |
| 10 | K <sub>2</sub> CO <sub>3</sub> – control | 0  | 23 | n/a  |

Conditions: 270 μmol 2,6-dimethoxybenzoic acid, 280 μmol iodoanisole, 10% Pd(OAc)<sub>2</sub> 20% ligand, 270 μmol silver carbonate, 1 mL d<sub>6</sub>-DMSO, 200°C microwave heating, 5 min. Reported yields are based on NMR quantization using 10 μL cyclooctane as internal standard.

**Table 2.** Screening of additives for the reaction shown above (Scheme 2).

| <i>Entry</i> | <i>Ligand</i>                    | <i>% yield 1</i> | <i>% yield 2</i> | <i>Ratio 1/2</i> |
|--------------|----------------------------------|------------------|------------------|------------------|
| 1            | AsPh <sub>3</sub>                | 59               | 23               | 2.54             |
| 2            | <sup>t</sup> BuXPhos             | 52               | 46               | 1.13             |
| 3            | dppf                             | 43               | 40               | 1.06             |
| 4            | AsPh <sub>3</sub> ,<br>NaOAc     | 39               | 52               | 0.75             |
| 5            | PPh <sub>3</sub>                 | 38               | 53               | 0.72             |
| 6            | OPPh <sub>3</sub>                | 38               | 33               | 1.16             |
| 7            | DPEPhos                          | 36               | 30               | 1.2              |
| 8            | PCy <sub>3</sub>                 | 32               | 23               | 1.4              |
| 9            | XantPhos                         | 23               | 12               | 2                |
| 10           | SbPh <sub>3</sub>                | 21               | 28               | 0.76             |
| 11           | bipyridine                       | 20               | 66               | 0.3              |
| 12           | NHC-CO <sub>2</sub> <sup>a</sup> | 9                | 86               | 0.1              |

13                      pyridine                      4                      60                      0.06

---

<sup>a</sup>NHC-CO<sub>2</sub>: N,N'-dimethylimidazolium carboxylate<sup>13</sup>; Conditions: 270 μmol 2,6-dimethoxybenzoic acid, 280 μmol iodoanisole, 10% Pd(OAc)<sub>2</sub> 20% AsPh<sub>3</sub>, 270 μmol additive, 1 mL d<sub>6</sub>-DMSO, 200 °C microwave heating, 5 min. Reported yields are based on NMR using 10 μL cyclooctane as internal standard and average of two trials.

### General catalytic protocol for coupling of benzoic acids with aryl iodides

A microwave reactor tube was loaded with 2,6-dimethoxybenzoic acid (0.0500 g, 270 μmol), iodoanisole (0.0655 g, 270 μmol), Pd(OAc)<sub>2</sub> (0.0061 g, 27 μmol), <sup>t</sup>BuXPhos (0.0264 g, 54 μmol), Ag<sub>2</sub>CO<sub>3</sub> (0.0833 g, 30 μmol, 1.1 equiv), 0.100 g 4Å activated molecular sieves and a stir bar. d<sub>6</sub>-DMSO was added and the suspension was stirred for 5 min at room temperature. The tube was then sealed with a septum, and heated to 200 °C in a Biotage microwave unit at 100 W maximum power for 5 min. After completion, the mixture was allowed to cool to 50 °C then diluted with 30 mL ethyl acetate and filtered through Celite. The organic fraction was washed with saturated NaCl solution (2 x 20 mL), dried over MgSO<sub>4</sub> and concentrated under vacuum. The residue was purified by column chromatography using hexanes/ethyl acetate (80:20) to give pure 2,4',6-trimethoxybiphenyl after drying (**1**, 0.0501 g, 75%).

### General catalytic protocol for coupling of benzoic acids with unsubstituted arenes

A microwave reactor tube was loaded with 2,6-dimethoxybenzoic acid (0.0500 g, 270 μmol), Pd(OAc)<sub>2</sub> (0.0061 g, 27 μmol), <sup>t</sup>BuXPhos (0.0264 g, 54 μmol), Ag<sub>2</sub>CO<sub>3</sub> (0.0833 g, 30 μmol, 1.1 equiv), 0.100 g 4Å activated molecular sieves and a stir bar. d<sub>6</sub>-DMSO and 2-phenylpyridine (50 μL, 270 μmol), was added and the suspension was stirred for 5 min at room temperature. The tube was then sealed with a septum, and heated to 200 °C in a Biotage microwave unit at 100 W maximum power for 5 min, with initial power set to 50 W. After completion, the mixture was allowed to cool to 50 °C then diluted with 30 mL ethyl acetate and filtered through Celite. The organic fraction was washed with

saturated NaCl solution (2 x 20 mL), dried over MgSO<sub>4</sub> and concentrated under vacuum. The residue was purified by column chromatography using hexanes/ether (80:20) to give pure 2,4',6-trimethoxybiphenyl after drying (**11**, 0.0459 g, 69%).

### Characterization of organic products

**2,4',6-Trimethoxybiphenyl (1):** <sup>1</sup>H NMR (500 MHz, CDCl<sub>3</sub>) δ: 3.67 (s, 6H), 3.76 (s, 3H), 6.75 (d, *J* = 8.3 Hz, 2H), 6.88 (d, *J* = 8.8 Hz, 2H), 7.19 (m, 3H). <sup>13</sup>C NMR (100 MHz, CDCl<sub>3</sub>) δ: 55.2, 55.9, 42.1, 33.1, 9.1, 26.1, 28.8, 41.3, 21.5, 78.1, 58.4

**1,3-Dimethoxybenzene (2):** <sup>1</sup>H NMR (400 MHz, CDCl<sub>3</sub>) δ: 3.72 (s, 6H), 6.42 (m, 3H), 7.11 (t, *J* = 8.2 Hz, 1H). <sup>13</sup>C NMR (125 MHz; CDCl<sub>3</sub>) δ: 54.2, 99.5, 105.2, 128.8, 159.9.

**4-Fluoro-4'-methoxybiphenyl (3):** <sup>1</sup>H NMR (400 MHz, CDCl<sub>3</sub>): 3.92 (s, 3H), 7.02 (d, *J* = 6.78 Hz, 2H), 7.21 (d, *J* = 8.63 Hz, 2H), 7.52-7.61 (m, 3H). <sup>13</sup>C NMR (125 MHz; CDCl<sub>3</sub>) δ: 55.45, 104.78, 114.76, 125.52, 128.85, 129.25, 131.25, 158.23, 160.23.

**1-(4-Methoxyphenyl)naphthalene (4):** <sup>1</sup>H NMR (400 MHz; CDCl<sub>3</sub>) δ: 3.93 (s, 3H), 7.08 (d, *J* = 8.6 Hz, 2H), 7.45-7.49 (m, 4H), 7.52-7.56 (m, 2H), 7.84 (d, *J* = 8.2 Hz, 1H), 7.95 (d, *J* = 9.2 Hz, 2H); <sup>13</sup>C NMR (100 MHz; CDCl<sub>3</sub>) δ: 56.1, 114.2, 125.5, 125.9, 127.1, 126.5, 127.7, 128.3, 129.6, 132.2, 132.9, 134.3, 134.9, 141.1, 160.

**2,4,6-Triisopropyl-4'-methoxybiphenyl (5)** <sup>1</sup>H NMR (400 MHz, CDCl<sub>3</sub>) δ: 1.15 (d, *J* = 6.9 Hz, 12H), 1.38 (d, *J* = 6.9 Hz, 6H), 2.73 (sept, *J* = 6.9 Hz, 2H), 3.01 (sept, *J* = 6.9 Hz, 1H), 3.92 (s, 3H), 7.01 (d, *J* = 8.7 Hz, 2H), 7.13 (s, 2H), 7.17 (d, *J* = 8.7 Hz, 2H). <sup>13</sup>C NMR (100 MHz, CDCl<sub>3</sub>) δ: 24.2, 30.1, 34.2, 55.0, 113.2, 120.4, 129.2, 130.5, 132.5, 136.3, 147.0, 147.6, 158.1.

**4'-Methoxy-4-methylbiphenyl (6):** <sup>1</sup>H NMR (500 MHz, CDCl<sub>3</sub>) δ: 2.24 (s, 3H), 3.79 (s, 3H), 6.85 (d, *J* = 8.5 Hz, 2H), 7.17 (d, *J* = 8.5 Hz, 2H), 7.48-7.41 (m, 4H). <sup>13</sup>C NMR (100 MHz, CDCl<sub>3</sub>) δ: 23.5, 35.1, 26.1, 25.2, 26.6, 35.1, 32.6, 35.1, 27.3, 159.5

**2,3,4,5,6-Pentafluoro-4'-methoxybiphenyl (7):**  $^1\text{H}$  NMR (400 MHz,  $\text{CDCl}_3$ )  $\delta$ : 3.85 (s, 3H), 7.02 (d,  $J = 8.8$  Hz, 2H), 7.33 (d,  $J = 8.8$  Hz, 2H).  $^{13}\text{C}$  NMR (100 MHz,  $\text{CDCl}_3$  (except for  $\text{C}_6\text{F}_5$ )  $\delta$  55.8, 114.1, 118.7, 131.3, 160.2;  $^{19}\text{F}$  NMR (282 MHz,  $\text{CDCl}_3$ )  $\delta$ : 163.7 (m, 2F), 157.7 (t,  $J = 21.0$  Hz, 1F), 144.9 (dd,  $J = 7.1, 23.1$  Hz, 2F).

## **TABLE 2**

**2,6-Dimethoxy-4'-methylbiphenyl (1b):**  $^1\text{H}$  NMR (400 MHz,  $\text{CDCl}_3$ )  $\delta$ : 2.40 (s, 3H), 3.75 (s, 6H), 6.69 (d,  $J = 8.3$  Hz, 2H), 7.30 (m, 5H).  $^{13}\text{C}$  NMR (100 MHz,  $\text{CDCl}_3$ ):  $\delta$  21.2, 55.7, 104.3, 120.0, 127.2, 127.4, 127.5, 128.2, 131.3, 133.9, 137.0, 157.6.

**2,6-Dimethoxy-4'-acetylbiphenyl (1c):**  $^1\text{H}$  NMR (400 MHz,  $\text{CDCl}_3$ )  $\delta$  (ppm): 2.54 (s, 3H), 3.65 (s, 6H), 6.60 (d,  $J = 8.3$  Hz, 2H), 7.28 (t,  $J = 8.3$  Hz, 1H), 7.42 (d,  $J = 8.3$  Hz, 2H), 8.04 (d,  $J = 8.3$  Hz, 2H).  $^{13}\text{C}$  NMR ( $\text{CDCl}_3$ ) 26.2, 56.4, 95.9, 105.5, 120.2, 132.1, 133.4, 162.5, 193.8; MS ( $m/z$ ) 256.

**9-(2',6'-Dimethoxyphenyl)-anthracene (1d):**  $^1\text{H}$  NMR (400 MHz,  $\text{CDCl}_3$ )  $\delta$  8.34 (s, 1 H), 7.62 (d,  $J = 8.5$  Hz, 2 H), 7.49 (dd,  $J = 8.5, 1.0$  Hz, 2 H), 7.38 (t,  $J = 8.3$  Hz, 1 H), 7.35-7.42 (m, 2 H), 7.23-7.35 (m, 2 H), 6.68 (d,  $J = 8.3$  Hz, 2 H), 3.39 (s, 6 H);  $^{13}\text{C}$  NMR (100 MHz,  $\text{CDCl}_3$ )  $\delta$  159.1, 131.7, 130.7, 130.4, 129.8, 128.7, 126.7, 126.6, 125.2, 125.1, 115.6, 104.4, 56.1;

**3-(2,6-Dimethoxyphenyl)-pyridine (1f):**  $^1\text{H}$  NMR (500 MHz,  $\text{CDCl}_3$ )  $\delta$ : 3.74 (s, 6H), 6.67 (d,  $J = 8$  Hz, 2H), 7.30-7.33 (m, 2H), 7.69 (d,  $J = 8$  Hz, 1H), 8.52 (d,  $J = 5$  Hz, 1H), 8.60 (d,  $J = 2$  Hz, 1H).  $^{13}\text{C}$  NMR (125 MHz,  $\text{CDCl}_3$ )  $\delta$ : 55.8, 115.6, 120.2, 122.6, 129.5, 129.9, 138.4, 147.6, 151.8, 157.6.

## **TABLE 3**

**2-(2',6'-dimethoxybiphenyl-2-yl)pyridine (10):**  $^1\text{H}$  NMR (400 MHz,  $\text{CD}_2\text{Cl}_2$ )  $\delta$ : 3.75 (s, 6H), 6.82 (d,  $J = 7.6$  Hz, 2H), 6.98 (t,  $J = 8.3$ , 1H), 7.16 (d,  $J = 8.3$  Hz, 1H), 7.32-29 (m,

3H), 7.43 (m, 3H), 7.72 (m, 1H), 7.90 (m, 1H), 8.12 (d,  $J = 8.5$  Hz, 1H).  $^{13}\text{C}$  NMR (125 MHz,  $\text{CD}_2\text{Cl}_2$ )  $\delta$ : 55.72, 102.91, 122.36, 122.89, 125.32, 128.55, 128.89, 129.53, 130.25, 131.23, 132.04, 136.23, 140.05, 147.54, 156.98, 157.55.

***N*-(2',6'-dimethoxybiphenyl-2-yl)acetamide (11):**  $^1\text{H}$  NMR (300 MHz,  $\text{CD}_2\text{Cl}_2$ )  $\delta$ : 2.15 (s, 3H), 3.72 (s, 6H), 5.92 (s, 1H), 6.87 (d,  $J = 8.3$  Hz), 7.25 (t,  $J = 8.5$  Hz, 1H), 7.38 (t,  $J = 8.5$  Hz, 1H), 7.47 (t,  $J = 8.3$  Hz, 1H), 7.52 (d,  $J = 8.6$  Hz, 1H), 7.98 (d,  $J = 8.5$  Hz, 1H).  $^{13}\text{C}$  NMR (125 MHz,  $\text{CD}_2\text{Cl}_2$ )  $\delta$ : 23.56, 56.23, 105.36, 120.38, 121.54, 122.67, 123.82, 128.43, 129.67, 131.35, 140.68, 154.58, 168.74. Mol. wt. calculated for Chemical Formula:  $\text{C}_{16}\text{H}_{17}\text{NO}_3$ : 271.3111 m/z, found: 271.3178.

**1-(2',6'-dimethoxybiphenyl-3-yl)ethanone (12):**  $^1\text{H}$  NMR (300 MHz,  $\text{CD}_2\text{Cl}_2$ )  $\delta$ : 2.42 (s, 3H), 3.72 (s, 6H), 6.85 (d,  $J = 8.3$  Hz, 2H), 7.21 (t,  $J = 8.5$  Hz, 1H), 7.45 (t,  $J = 8.5$  Hz, 1H), 7.59 (t,  $J = 8.5$  Hz, 1H), 7.82 (d,  $J = 8.5$  Hz, 1H), 8.01 (d,  $J = 8.5$  Hz, 1H).  $^{13}\text{C}$  NMR (125 MHz,  $\text{CD}_2\text{Cl}_2$ )  $\delta$ : 27.31, 56.33, 104.12, 104.76, 122.65, 128.54, 128.98, 129.65, 130.44, 131.16, 140.30, 140.05, 157.92. Mol. wt. calculated for Chemical Formula:  $\text{C}_{16}\text{H}_{16}\text{O}_3$ : 256.2964 m/z, found: 256.2934.

#### Reference:

1. Becht, J.; Catala, C.; Le Drian, C.; Wagner, A. *Org. Lett.* 2007, **9**, 1781.
2. Saa, J. M.; Dopico, M.; Martorell, G.; Garcia-Raso, A. *J. Org. Chem.* 1990, **55**, 991.
3. Moore, L. R.; Western, E. C.; Craciun, R.; Spruell, J. M.; Dixon, D. A.; O'Halloran, K. P.; Shaughnessy, K. H. *Organometallics* 2008, **27**, 576.
4. Spivey, A. C.; Tseng, C.; Hannah; Gripton, C. J.; de Fraine, P.; Parr, N. J.; Scicinski, J. *J. Chem. Commun.*, 2007, 2926.
5. Milne, J. E.; Buchwald, S. L. *J. Am. Chem. Soc.*, 2004, **126**, 13028-13032.
6. Wei, W.; Qin, Y.; Luo, M.; Xia, P.; Shing Wong, M. *Organometallics* 2008, **27**, 2268.
7. Korenaga, T.; Kosaki, T.; Fukumura, R.; Ema, T.; Sakai, T. *Org. Lett.* 2005, **7**, 4915.
8. Becht, J. Gissot, A. Wagner, A. Mioskowski, C. *Chem. Eur. J.* 2003, **9**, 3209-3215.
9. Song, C.; Ma, Y.; Chai, Q.; Ma, C.; Jiang, W.; Andrus, M. B. *Tetrahedron* 2005, **61**, 7438.
10. Yin, J.; Rainka, M. P.; Zhang, X.-X.; Buchwald, S. L. *J. Am. Chem. Soc.* 2002, **124**, 1162.

11. Barder, T. E.; Walker, S. D.; Martinelli, J. R.; Buchwald, S. L. *J. Am. Chem. Soc.* 2005, **127**, 4685.
12. Anderson, K. W.; Tundel, R. E.; Ikawa, T.; Altman, R. A.; Buchwald, S. L. *Angew. Chem. Int. Ed.* 2006, **45**, 6523.
13. Voutchkova, A. M.; Appelhans, L. N.; Chianese, A. R.; Crabtree, R. H. *J. Am. Chem. Soc.* 2005, **127**, 17624.
